# Supplementary material for: Magnetic circular dichroism spectra of transition metal complexes calculated from restricted active space wavefunctions
Source: Royal Society of Chemistry journal article supplement (doi:10.1039/c8cp07849a), 2019-01-01
Supplement: c8cp07849a1.pdf [file c8cp07849a1.pdf]

Supporting Information for *Magnetic circular dichroism spectra of transition metal complexes calculated from restricted active space wavefunctions*

Yonaton Heit, Dumitru-Claudiu Sergentu and Jochen Autschbach\*

Department of Chemistry  
University at Buffalo  
State University of New York  
Buffalo, NY 14260-3000, USA  
email: jochena@buffalo.edu

February 7, 2019

Table S1: Calculated vs. experimental bond lengths (in Å).

|                               | TD-KST/CAM-B3LYP | Expt              |
|-------------------------------|------------------|-------------------|
| $\text{PdCl}_4^{2-}$          | 2.33             | 2.30 <sup>1</sup> |
| $\text{PdBr}_4^{2-}$          | 2.47             | –                 |
| $\text{AuCl}_4^-$             | 2.30             | 2.27 <sup>2</sup> |
| $\text{AuBr}_4^-$             | 2.45             | 2.43 <sup>3</sup> |
| $\text{CuCl}_4^{2-}$          | 2.27             | 2.26 <sup>4</sup> |
| $\text{CuBr}_4^{2-}$          | 2.41             | 2.41 <sup>5</sup> |
| $\text{MnO}_4^-$              | 1.58             | 1.63 <sup>6</sup> |
| $\text{Fe}(\text{CN})_6^{3-}$ | 1.92             | 1.95 <sup>7</sup> |

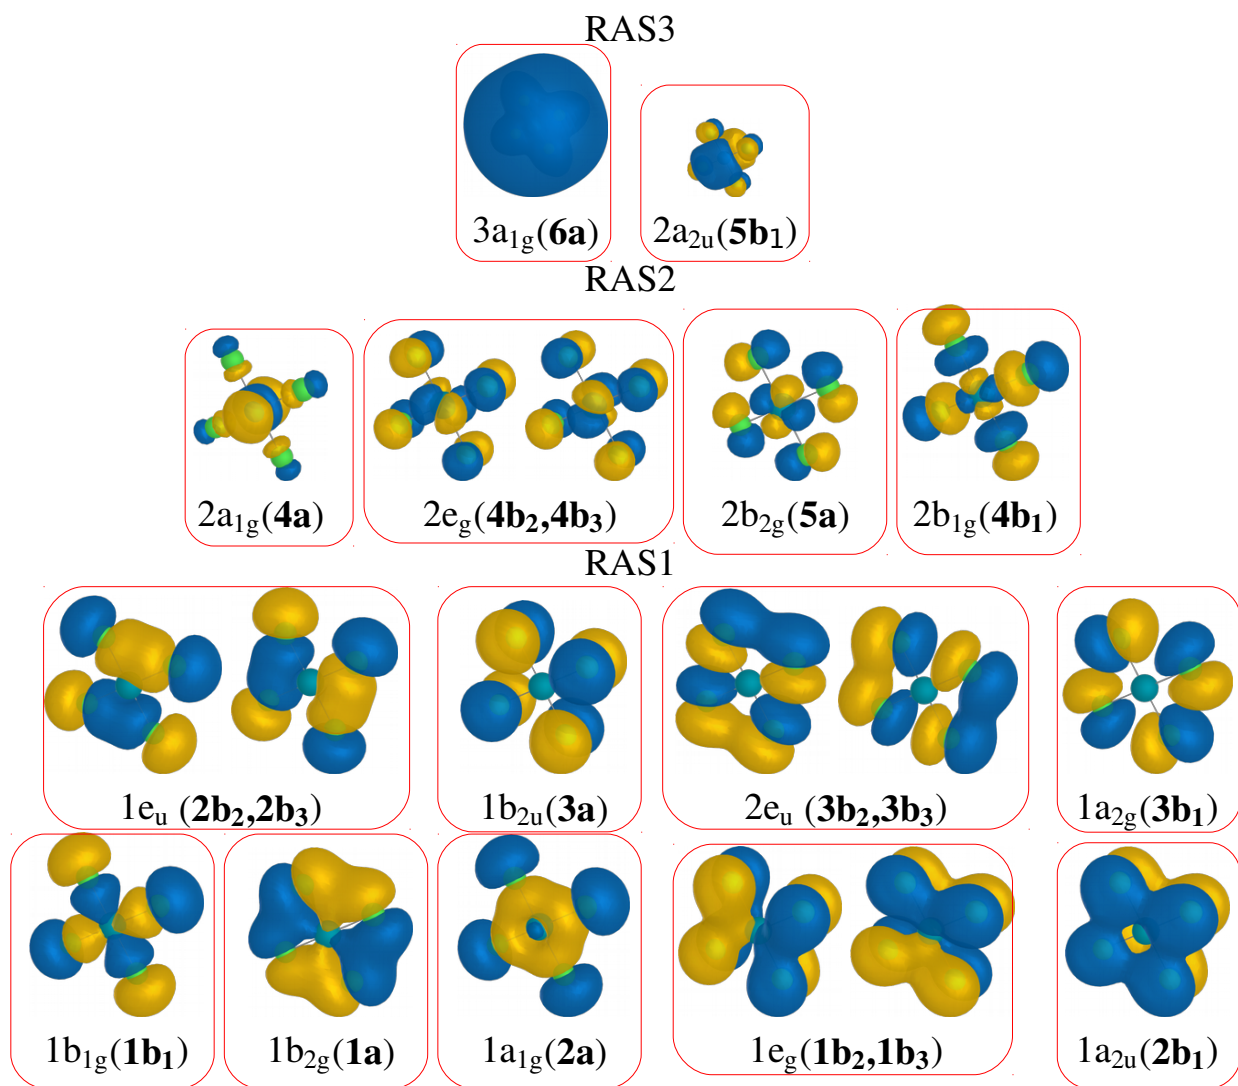

Figure S1:  $\text{PdCl}_4^{2-}$  active space orbitals visualized as isosurfaces of  $\pm 0.03$  except for the  $4a_1$  ( $\pm 0.005$ ) and  $4b_2$  ( $\pm 0.02$ ) RAS3 orbitals. Symmetry labels are from the  $D_{4h}$  ( $D_2$ ) point group.

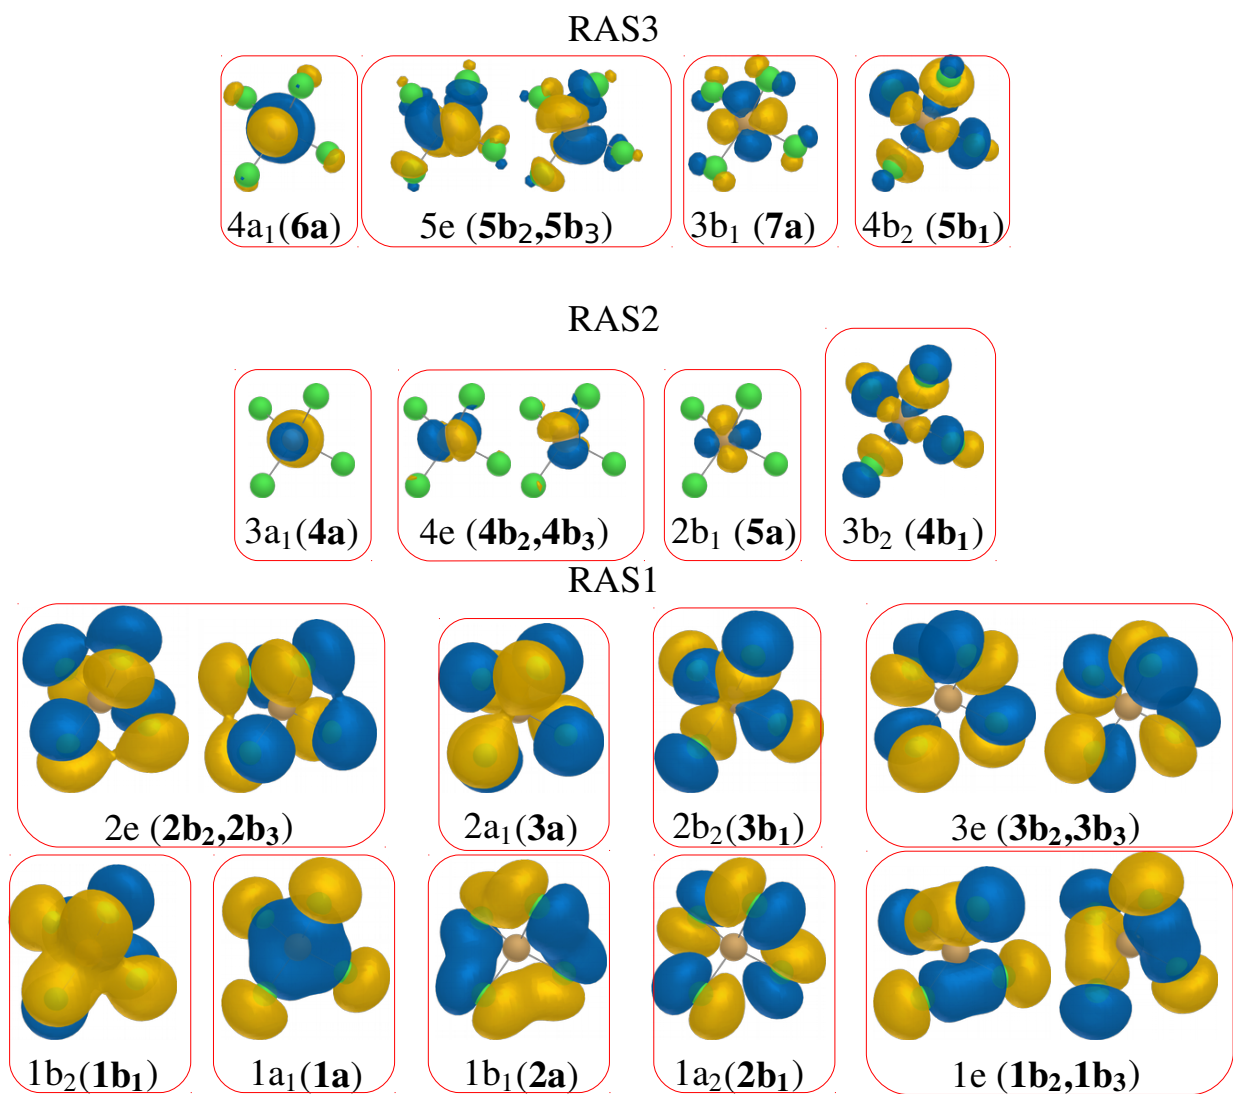

Figure S2:  $\text{CuCl}_4^{2-}$  active space orbitals visualized as isosurfaces ( $\pm 0.03$ ). Symmetry labels are from the  $D_{2d}$  ( $D_2$ ) point group.

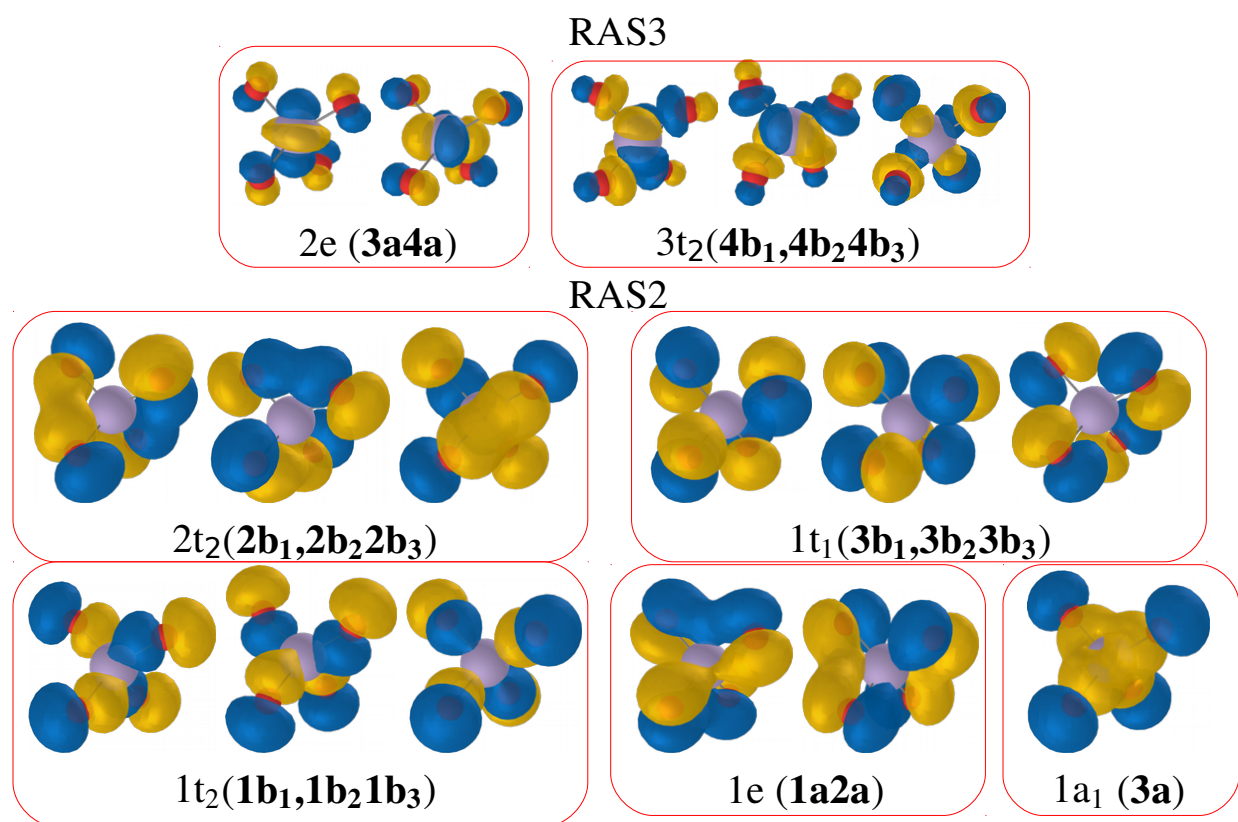

Figure S3:  $\text{MnO}_4^-$  active space orbitals visualized as isosurfaces ( $\pm 0.08$ ). Symmetry labels are from the  $T_d$  ( $D_2$ ) point group.

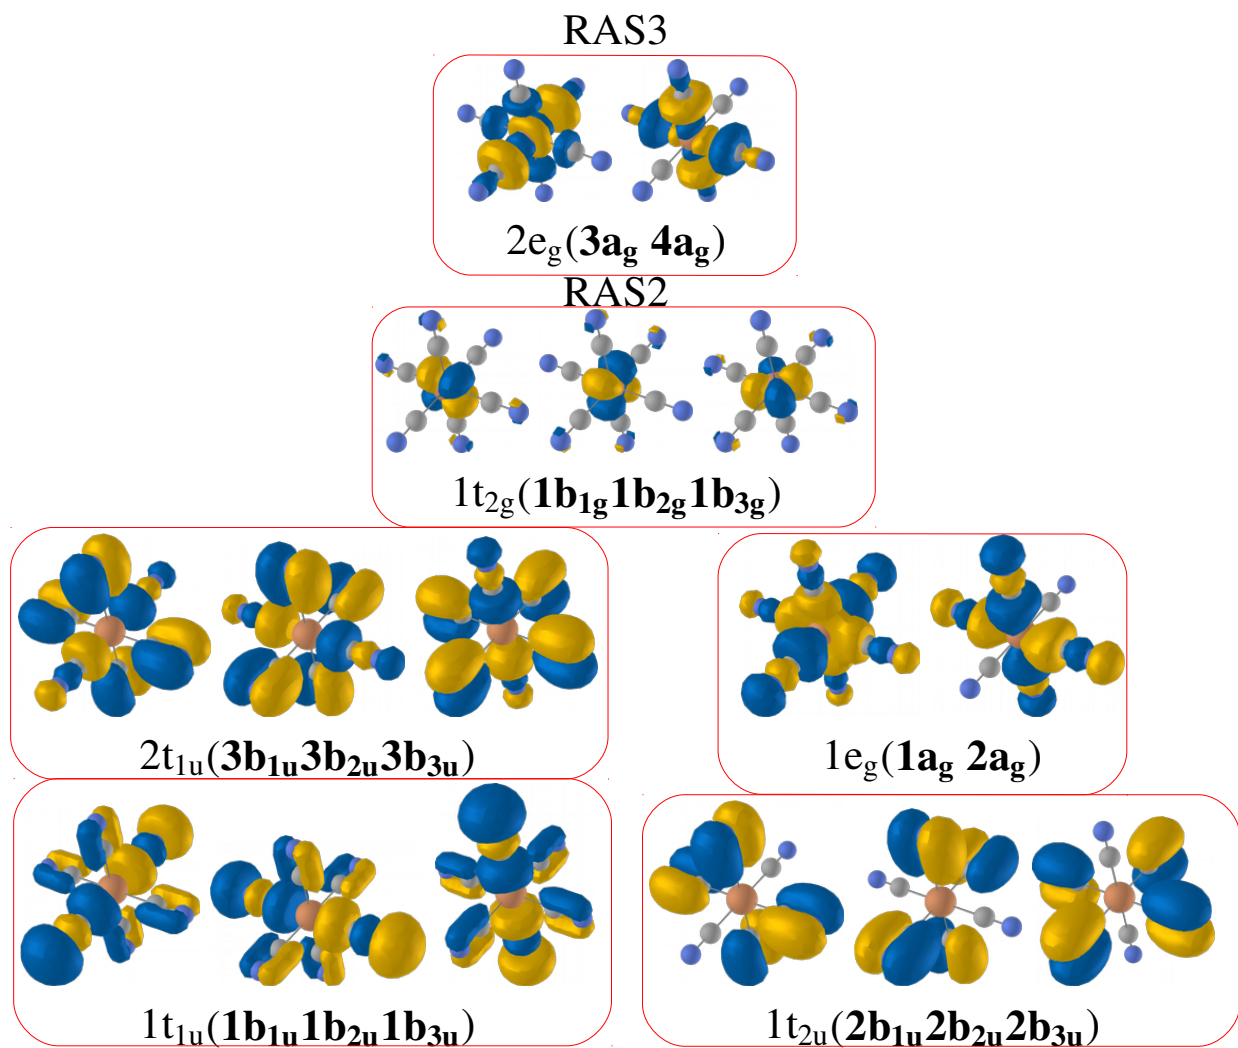

Figure S4:  $\text{Fe}(\text{CN})_6^{3-}$  active space orbitals visualized as isosurfaces ( $\pm 0.04$ ). Symmetry labels are from the  $O_h$  ( $D_{2h}$ ) point group.

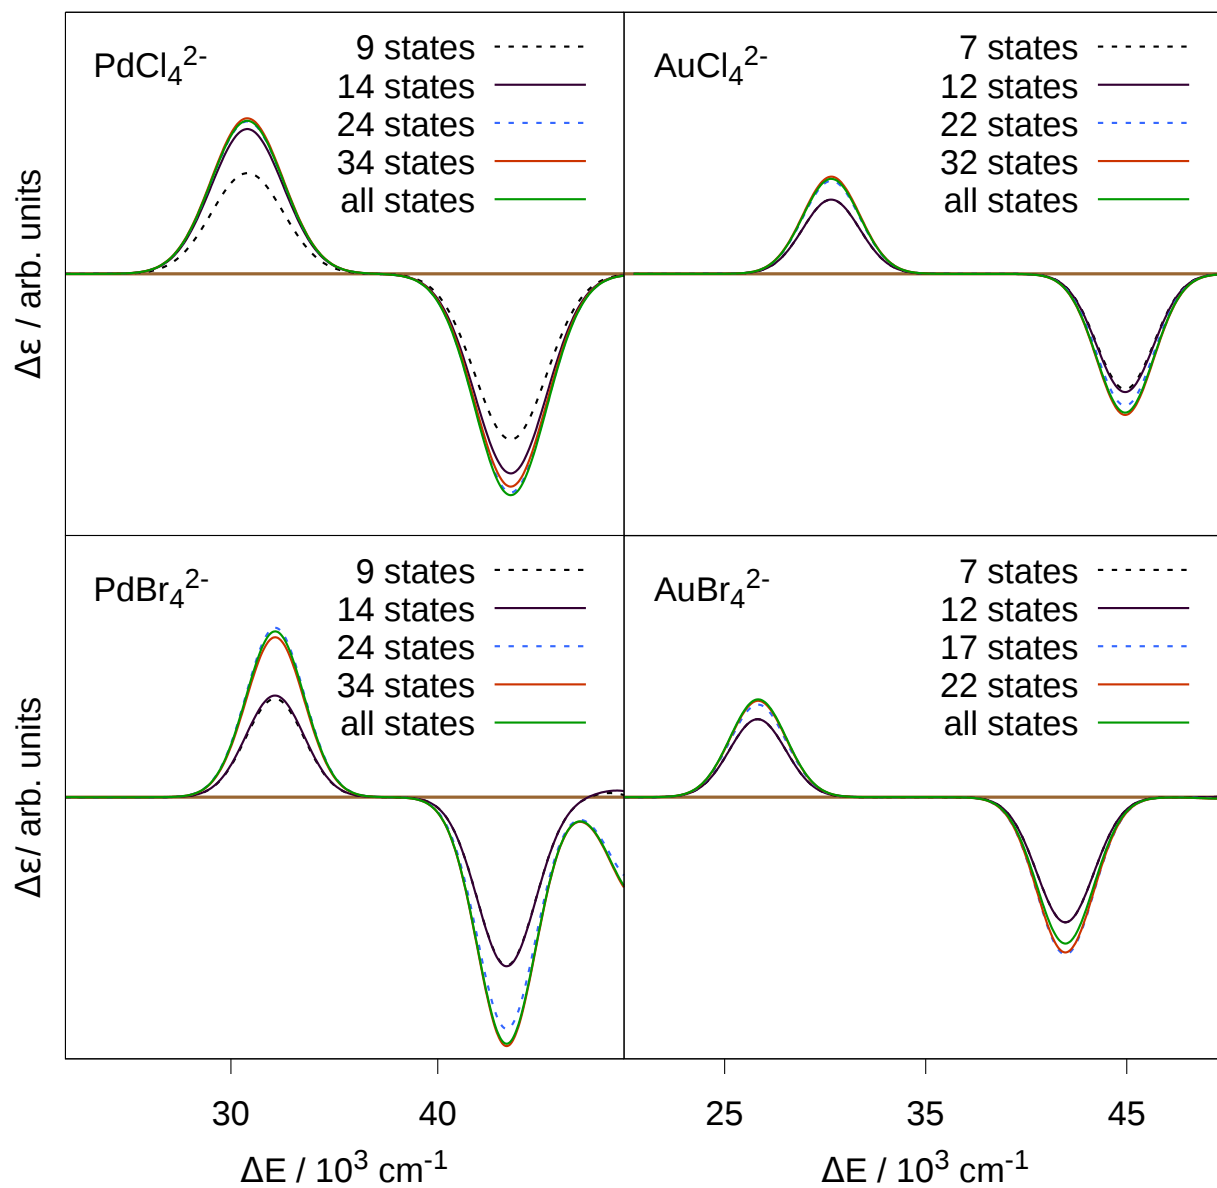

Figure S5: Calculated  $B$ -term spectra, for the various  $d^8$  complexes, with an increasing number of states for the SOS of Equation 4 (see the main article). The spectra were produced with a Gaussian broadening of  $2000 \text{ cm}^{-1}$  for the individual transitions. The solid black curves correspond to the experimental spectra.<sup>8</sup>

Table S2: Calculated excitation energies and oscillator strengths ( $f$ ), for various  $d^8$  complexes, with TD-KST.<sup>a</sup>

|                                 | State                                            | $\Delta E$ (cm <sup>-1</sup> ) | $f$      |
|---------------------------------|--------------------------------------------------|--------------------------------|----------|
| PdCl <sub>4</sub> <sup>2-</sup> | <sup>1</sup> E <sub>u</sub> (2e <sub>u</sub> )   | 35471                          | 0.492    |
|                                 | <sup>1</sup> A <sub>2u</sub> (1b <sub>2u</sub> ) | 36584                          | 0.001403 |
|                                 | <sup>1</sup> E <sub>u</sub> (1e <sub>u</sub> )   | 45100                          | 1.376    |
| PdBr <sub>4</sub> <sup>2-</sup> | <sup>1</sup> E <sub>u</sub> (2e <sub>u</sub> )   | 29408                          | 0.592    |
|                                 | <sup>1</sup> A <sub>2u</sub> (1b <sub>2u</sub> ) | 30932                          | 0.00269  |
|                                 | <sup>1</sup> E <sub>u</sub> (1e <sub>u</sub> )   | 39558                          | 1.593    |
| AuCl <sub>4</sub> <sup>-</sup>  | <sup>1</sup> A <sub>2u</sub> (1b <sub>2u</sub> ) | 30304                          | 0.000693 |
|                                 | <sup>1</sup> E <sub>u</sub> (2e <sub>u</sub> )   | 30586                          | 0.103    |
|                                 | <sup>1</sup> E <sub>u</sub> (1e <sub>u</sub> )   | 45090                          | 1.048    |
| AuBr <sub>4</sub> <sup>-</sup>  | <sup>1</sup> E <sub>u</sub> (1e <sub>u</sub> )   | 24805                          | 0.389    |
|                                 | <sup>1</sup> A <sub>2u</sub> (1b <sub>2u</sub> ) | 25465                          | 0.00143  |
|                                 | <sup>1</sup> E <sub>u</sub> (2e <sub>u</sub> )   | 37044                          | 1.938    |

<sup>a</sup>The main excited orbital is noted between parentheses; the acceptor orbital is always 2b<sub>1g</sub>.

Table S3: Change in RAS-SCF orbital natural occupations involved in the first three intense transitions of MnO<sub>4</sub><sup>-</sup>.

| $\Delta E$ (cm <sup>-1</sup> ) | Transition                                                                                                                                                                               |
|--------------------------------|------------------------------------------------------------------------------------------------------------------------------------------------------------------------------------------|
| 21799                          | (1t <sub>1</sub> ) <sup>5.73</sup> (2e) <sup>0.464</sup> → (1t <sub>1</sub> ) <sup>5.01</sup> (2e) <sup>1.27</sup>                                                                       |
| 31153                          | (1t <sub>1</sub> ) <sup>5.73</sup> (2t <sub>2</sub> ) <sup>5.73</sup> (2e) <sup>0.464</sup> → (1t <sub>1</sub> ) <sup>5.32</sup> (2t <sub>2</sub> ) <sup>5.29</sup> (2e) <sup>1.28</sup> |
| 36447                          | (1t <sub>1</sub> ) <sup>5.73</sup> (3t <sub>2</sub> ) <sup>0.50</sup> → (1t <sub>1</sub> ) <sup>4.98</sup> (3t <sub>2</sub> ) <sup>1.27</sup>                                            |

Table S4: Excitation energies and oscillator strengths ( $f$ ) calculated with TD-KST for the first three intense transitions of MnO<sub>4</sub><sup>-</sup>.

| Transition                                              | $\Delta E$ (cm <sup>-1</sup> ) | $f$    |
|---------------------------------------------------------|--------------------------------|--------|
| 1t <sub>1</sub> → 2e                                    | 25694                          | 0.0909 |
| 1t <sub>1</sub> , 2t <sub>2</sub> → 2e                  | 36195                          | 0.0268 |
| 1t <sub>1</sub> , 2t <sub>2</sub> → 2e, 3t <sub>2</sub> | 39737                          | 0.110  |

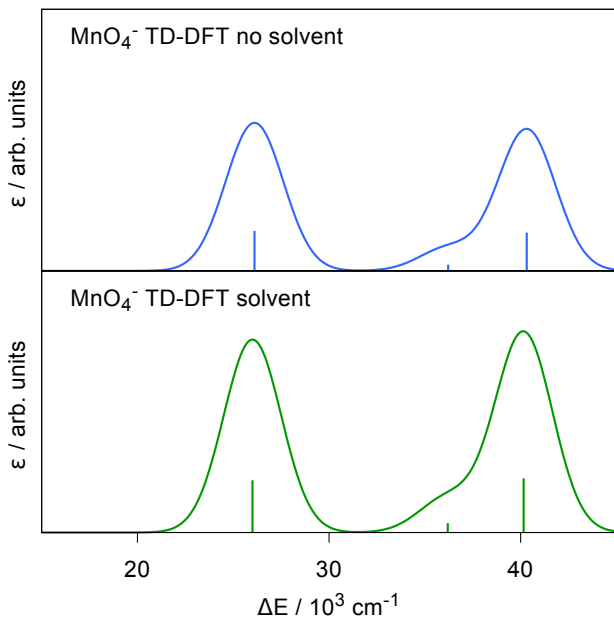

Figure S6: Calculated absorption spectrum of  $\text{MnO}_4^-$  with TD-KST in the gas-phase (top) and in water solvent (bottom). The spectra were produced with a Gaussian broadening for the individual transitions of  $1500\text{ cm}^{-1}$ .

Table S5: Calculated low-energy SR states for  $d^9$  complexes. Assignments are made in the  $D_{2d}$  symmetry point group.<sup>a</sup>

|                      |                                    | RAS-CI                          | PT2//CI                         |
|----------------------|------------------------------------|---------------------------------|---------------------------------|
|                      |                                    | $\Delta E$ ( $\text{cm}^{-1}$ ) | $\Delta E$ ( $\text{cm}^{-1}$ ) |
| $\text{CuCl}_4^{2-}$ | $1^2\text{B}_2$                    | 0                               | 0                               |
|                      | $1^2\text{E}$ (3e)                 | 61658                           | 26933                           |
|                      | $2^2\text{E}$ (2e)                 | 66694                           | 33228                           |
|                      | $1^2\text{B}_1$ (2b <sub>1</sub> ) | 70510                           | 35423                           |
|                      | $3^2\text{E}$ (1e)                 | 70947                           | 36259                           |
|                      | $1^2\text{A}_1$ (2a <sub>1</sub> ) | 74758                           | 43807                           |
| $\text{CuBr}_4^{2-}$ | $1^2\text{B}_2$                    | 0                               | 0                               |
|                      | $1^2\text{A}_2$ (1a <sub>2</sub> ) | 51527                           | 13289                           |
|                      | $1^2\text{E}$ (3e)                 | 52049                           | 20390                           |
|                      | $2^2\text{B}_2$ (2b <sub>2</sub> ) | 55317                           | 22993                           |
|                      | $2^2\text{E}$ (2e)                 | 56797                           | 26430                           |
|                      | $3^2\text{B}_2$ (1b <sub>2</sub> ) | 60045                           | 25453                           |
|                      | $1^2\text{B}_1$ (1b <sub>1</sub> ) | 62338                           | 29716                           |
|                      | $3^2\text{E}$ (1e)                 | 61454                           | 29726                           |
|                      | $1^2\text{A}_1$ (1a <sub>1</sub> ) | 66593                           | 39126                           |

<sup>a</sup>The main excited orbital is given in parentheses; the acceptor orbital is always  $3b_2$ .



Table S6: Calculated SO states for  $d^9$  complexes. The SO states are developed in terms of the SR states listed in Table S5.

|                | $\Delta E$ (cm $^{-1}$ ) | RAS-CI+SO                                   | $\Delta E$ (cm $^{-1}$ ) | PT2//CI+SO                  |
|----------------|--------------------------|---------------------------------------------|--------------------------|-----------------------------|
| CuCl $_4^{2-}$ | 0                        | 99% 1 $^2B_2$                               | 0                        | 99% 1 $^2B_2$               |
|                | 61585                    | 85% 1 $^2E$ + 15% 1 $^2A_2$                 | 26942                    | 99% 1 $^2E$                 |
|                | 61877                    | 100% 1 $^2E$                                | 27146                    | 100% 1 $^2E$                |
|                | 62041                    | 85% 1 $^2A_2$ + 15% 1 $^2E$                 | 33321                    | 98% 2 $^2E$                 |
|                | 66811                    | 99% 2 $^2E$                                 | 33330                    | 100% 2 $^2E$                |
|                | 66864                    | 94% 2 $^2E$                                 | 36352                    | 93% 3 $^2E$                 |
|                | 71043                    | 89% 3 $^2E$ + 11% 1 $^2B_1$                 | 36470                    | 100% 3 $^2E$                |
|                | 71166                    | 100% 3 $^2E$                                | 43925                    | 100% 1 $^2A_1$              |
|                | 74886                    | 100 1 $^2A_1$                               |                          |                             |
| CuBr $_4^{2-}$ | 0                        | 99% 1 $^2B_2$                               | 0                        | 99% 1 $^2B_2$               |
|                | 51278                    | 78% 1 $^2E$ + 21% 1 $A_2$                   | 20016                    | 99% 1 $^2E$                 |
|                | 52339                    | 96% 1 $^2E$                                 | 20394                    | 85% 1 $^2E$ + 15% 2 $^2B_2$ |
|                | 52755                    | 75% 1 $A_2$ + 20% 1 $^2E$                   | 23382                    | 81% 2 $^2B_2$ + 12% 1 $^2E$ |
|                | 56969                    | 80% 2 $^2E$ + 12% 2 $^2B_2$                 | 26732                    | 74% 2 $^1E$ + 13% 3 $^2B_2$ |
|                | 60175                    | 79% 3 $^2B_2$                               | 29171                    | 56% 3 $^2E$ + 41% 1 $^2B_1$ |
|                | 61254                    | 73% 3 $^2E$ + 13% 3 $^2B_2$ + 10% 1 $^2B_1$ | 30527                    | 93% 3 $^2E$                 |
|                | 62295                    | 92% 3 $^2E$                                 | 30674                    | 55% 1 $^2B_1$ + 36% 3 $^2E$ |
|                | 62987                    | 80% 1 $^2B_1$ + 14% 3 $^2E$                 | 39321                    | 99% 1 $^2A_1$               |
|                | 66841                    | 99% 1 $^2A_1$                               |                          |                             |

Table S7: Spin-orbit excitation energies and oscillator strengths ( $f$ ) calculated with TD-KST+SO for Cu $^{2+}$  complexes.

|                | State | $\Delta E$ (cm $^{-1}$ ) | $f$    |
|----------------|-------|--------------------------|--------|
| CuCl $_4^{2-}$ | 12A   | 24326                    | 0.0440 |
|                | 13A   | 24367                    | 0.0414 |
|                | 24A   | 34040                    | 0.126  |
|                | 26A   | 34439                    | 0.125  |
|                | 33A   | 43036                    | 0.0950 |
| CuBr $_4^{2-}$ | 10A   | 16690                    | 0.0144 |
|                | 12A   | 18332                    | 0.0358 |
|                | 14A   | 19161                    | 0.0332 |
|                | 16A   | 23621                    | 0.0121 |
|                | 23A   | 26922                    | 0.0609 |
|                | 24A   | 28050                    | 0.0877 |
|                | 27A   | 29760                    | 0.122  |
|                | 32A   | 37891                    | 0.121  |

Table S8: Excitation energies calculated with MC-pDFT-SR for  $\text{Fe}(\text{CN})_6^{3-}$ .

| State    | $\Delta E$ ( $\text{cm}^{-1}$ ) | Excitation                                                                      |
|----------|---------------------------------|---------------------------------------------------------------------------------|
| $T_{2g}$ | 0                               |                                                                                 |
| $T_{1u}$ | 20098                           | $(2t_{1u})^{6.00}(1t_{2g})^{4.98} \rightarrow (2t_{1u})^{5.00}(1t_{2g})^{6.00}$ |
| $T_{2u}$ | 29437                           | $(1t_{2u})^{6.00}(1t_{2g})^{4.98} \rightarrow (1t_{2u})^{5.00}(1t_{2g})^{6.00}$ |
| $T_{1u}$ | 32978                           | $(1t_{1u})^{6.00}(1t_{2g})^{4.98} \rightarrow (1t_{1u})^{5.00}(1t_{2g})^{6.00}$ |

Table S9: Spin-orbit excitation energies (in  $\text{cm}^{-1}$ ) and oscillator strengths ( $f$ ) calculated with TD-KST+SO for  $\text{Fe}(\text{CN})_6^{3-}$ .

| State | $\Delta E$ | $f$     |
|-------|------------|---------|
| 16A   | 31983      | 0.00285 |
| 17A   | 32051      | 0.00487 |
| 19A   | 32691      | 0.0359  |
| 21A   | 32942      | 0.0321  |
| 41A   | 41464      | 0.00481 |
| 42A   | 41599      | 0.00204 |
| 43A   | 41621      | 0.00247 |
| 44A   | 41995      | 0.0483  |
| 56A   | 42285      | 0.0578  |
| 51A   | 47447      | 0.00140 |
| 52A   | 47504      | 0.00389 |
| 55A   | 48033      | 0.0182  |
| 58A   | 48142      | 0.0292  |

Table S10: TD-KST/CAM-B3LYP optimized structures.

|                      |              |              |              |                               |             |             |              |
|----------------------|--------------|--------------|--------------|-------------------------------|-------------|-------------|--------------|
| $\text{PdCl}_4^{2-}$ |              |              |              | $\text{AuCl}_4^-$             |             |             |              |
| Pd                   | 0.000000000  | 0.000000000  | 0.000000000  | Pd                            | 0.000000000 | 0.000000000 | 0.000000000  |
| Cl                   | 1.649946700  | 1.649946700  | 0.000000000  | Br                            | 1.74514519  | 1.74514519  | 0.000000000  |
| Cl                   | -1.649946700 | -1.649946700 | 0.000000000  | Br                            | -1.74514519 | -1.74514519 | 0.000000000  |
| Cl                   | -1.649946700 | 1.649946700  | 0.000000000  | Br                            | -1.74514519 | 1.74514519  | 0.000000000  |
| Cl                   | 1.649946700  | -1.649946700 | 0.000000000  | Br                            | 1.74514519  | -1.74514519 | 0.000000000  |
| $\text{PdBr}_4^{2-}$ |              |              |              | $\text{AuBr}_4^-$             |             |             |              |
| Au                   | 0.000000000  | 0.000000000  | 0.000000000  | Au                            | 0.000000000 | 0.000000000 | 0.000000000  |
| Cl                   | 1.628937850  | 1.628937850  | 0.000000000  | Br                            | 1.73135590  | 1.73135590  | 0.000000000  |
| Cl                   | -1.628937850 | -1.628937850 | 0.000000000  | Br                            | -1.73135590 | -1.73135590 | 0.000000000  |
| Cl                   | -1.628937850 | 1.628937850  | 0.000000000  | Br                            | -1.73135590 | 1.73135590  | 0.000000000  |
| Cl                   | 1.628937850  | -1.628937850 | 0.000000000  | Br                            | 1.73135590  | -1.73135590 | 0.000000000  |
| $\text{CuCl}_4^{2-}$ |              |              |              | $\text{CuBr}_4^{2-}$          |             |             |              |
| Cu                   | 0.000000000  | 0.000000000  | 0.000000000  | Cu                            | 0.000000000 | 0.000000000 | 0.000000000  |
| Cl                   | 1.485418000  | 1.485418000  | 0.859124000  | Br                            | 1.56044100  | 1.56044100  | 0.964758000  |
| Cl                   | -1.485418000 | -1.485418000 | 0.859124000  | Br                            | -1.56044100 | -1.56044100 | 0.964758000  |
| Cl                   | -1.485418000 | 1.485418000  | -0.859124000 | Br                            | -1.56044100 | 1.56044100  | -0.964758000 |
| Cl                   | 1.485418000  | -1.485418000 | -0.859124000 | Br                            | 1.56044100  | -1.56044100 | -0.964758000 |
| $\text{MnO}_4^-$     |              |              |              | $\text{Fe}(\text{CN})_6^{3-}$ |             |             |              |
| Mn                   | 0.000000000  | 0.000000000  | 0.000000000  | Fe                            | 0.000000000 | 0.000000000 | 0.000000000  |
| O                    | 0.911737000  | 0.911737000  | 0.911737000  | C                             | 0.000000000 | 0.000000000 | 1.932242000  |
| O                    | 0.911737000  | -0.911737000 | -0.911737000 | C                             | 0.000000000 | 1.93224200  | 0.000000000  |
| O                    | -0.911737000 | -0.911737000 | 0.911737000  | C                             | 1.93224200  | 0.000000000 | 0.000000000  |
| O                    | -0.911737000 | 0.911737000  | -0.911737000 | C                             | 0.000000000 | 0.000000000 | -1.932242000 |
|                      |              |              |              | C                             | 0.000000000 | -1.93224200 | 0.000000000  |
|                      |              |              |              | C                             | -1.93224200 | 0.000000000 | 0.000000000  |
|                      |              |              |              | N                             | 0.000000000 | 0.000000000 | 3.087170000  |
|                      |              |              |              | N                             | 0.000000000 | 3.08717000  | 0.000000000  |
|                      |              |              |              | N                             | 3.08717000  | 0.000000000 | 0.000000000  |
|                      |              |              |              | N                             | 0.000000000 | 0.000000000 | -3.087170000 |
|                      |              |              |              | N                             | 0.000000000 | -3.08717000 | 0.000000000  |
|                      |              |              |              | N                             | -3.08717000 | 0.000000000 | 0.000000000  |

## References

- [1] Zvegintzoff, D.; Bois, C.; Dao, Q. N. *J. Inorg. NuCl. Chem.* **1981**, *43*, 3183–3185.
- [2] Hollis, L. S.; Lippard, S. J. *J. Am. Chem. Soc.* **1983**, *105*, 4293–4299.
- [3] Makotchenko, E. V.; Baidina, I. A.; Korol'kov, I. V. *J. Struct. Chem.* **2014**, *55*, 887-894.
- [4] Harlow, R. L.; Wells, W. J.; Watt, G. W.; Simonsen, S. H. *Inorg. Chem.* **1974**, *13*, 2106–2111.
- [5] Ma, L.; Sun, J.; Lu, X.; Zhang, S.; Qi, H.; Liu, L.; Shao, Y.; Shao, X. *Beilstein J. Org. Chem.* **2015**, *11*, 850–859.
- [6] Palenik, G. J. *Inorg. Chem.* **1967**, *6*, 503–507.
- [7] Vannerberg, N.-G. *Acta Chem. Scand.* **1972**, *26*, 2863–2876.
- [8] McCaffery, A.; Schatz, P. N.; Stephens, P. J. *J. Am. Chem. Soc.* **1968**, *90*, 5730–5735.
